# Supplementary material
Source: MDPI journal article supplement (https://www.mdpi.com/1999-4907/8/11/419)
Supplement: s1 [file s1]

## Sheet: density
S1: The density of shrub species (individuals per square meter)
Shrub specie	Plantation	Density (individuals per square meter)
		1-year-old	3-year-old	4-year-old	6-year-old
Rhodomyrtus tomentosa	NS	0.685333	0.443704	0.378889	0.199111
	EU	0.465185	0.541587	0.419259	0.315062
	AC	0.948148	0.775556	0.677037	0.4
	CH	0.61037	0.328148	0.257037	0.152593
	M10	1.41481	0.820741	0.741481	0.237037
	M30	1.22074	0.263704	0.408889	0.501481
Ilex asprella	NS	0.0188889	0.0516667	0.0315556	0.0316667
	EU	0.042963	0.0488889	0.0227778	0.0488889
	AC	0.0414815	0.0785185	0.0533333	0.0577778
	CH	0.0177778	0.0155556	0.0311111	0.0192593
	M10	0.0266667	0.0422222	0.022963	0.0355556
	M30	0.0133333	0.0177778	0.0340741	0.0192593
Melastoma candidum	NS	0.0788889	0.0411111	0.0414815	0.0333333
	EU	0.0577778	0.0444444	0.0655556	0.0574603
	AC	0.0740741	0.0511111	0.0918519	0.0644444
	CH	0.10963	0.0577778	0.0755556	0.062963
	M10	0.0385185	0.141481	0.0896296	0.0548148
	M30	0.182222	0.057037	0.105926	0.0577778
Gardenia jasminoides	NS	0.0244444	0.00977778	0.0231111	0.0205556
	EU	0.0414815	0.0185185	0.0155556	0.0253968
	AC	0.0518519	0.0592593	0.0548148	0.0525926
	CH	0.00888889	0.00740741	0.00962963	0.0207407
	M10	0.0222222	0.0496296	0.0214815	0.0296296
	M30	0.0725926	0.0266667	0.0192593	0.04
Clerodendrum fortunatum	NS	0.345926	0.369333	0.184889	0.0288889
	EU	0.603951	0.215873	0.0548148	0.08
	AC	0.545185	0.394074	0.280741	0.102963
	CH	1.24148	0.479259	0.241481	0.2
	M10	1.06222	0.178519	0.320741	0.0711111
	M30	1.16148	0.40963	0.268148	0.0851852
Baeckea frutescens	NS	0.593333	0.586667	0.548519	0.213333
	EU	0.307222	0.224444	0.18	0.0565432
	AC	0.173333	0.159259	0.174074	0.0155556
	CH	0.927407	0.403704	0.264444	0.0222222
	M10	1.32444	0.835556	0.72963	0.0748148
	M30	0.924444	0.254074	0.192593	0.0333333
Note: NS, EU, AC, CH, M10 and M30 stand for naturally recovered shrubland, Eucalyptus urophylla, Acacia crassicarpa, Castanopsis hystrix, 10-species mixed plantation and 30-species mixed plantation.
